# Supplementary material
Source: ML conference proceedings conference paper supplement (https://proceedings.mlr.press/v139/jing21a.html)
Supplement: Supplementary file 1 [file jing21a-supp.pdf]

## A. Appendix

### A.1. Proofs for Propositions and Theorems

Here we provide the proofs for the propositions and theorems used in our Option-GAIL.

#### A.1.1. PROOF FOR $\mathcal{O}_{\text{ONE-STEP}} = \mathcal{O}$

According to Assumption 1.1, an option can be activated at any state, thus the intra-option policy  $\pi_o(a|s)$ , break policy  $\beta_{o'}(s)$  and inter-option policy  $\pi_{\mathcal{O}}(o|s)$  are all well-defined on any  $s \in \mathbb{S}, \forall o \in \mathcal{O}$ . This suggests that  $\pi_L(a|s, o) \equiv \pi_o(a|s)$  holds over all options on any state. For  $\beta_{o'}(s)$ , with Assumption 1.2, we have  $\beta_{o'}(s) = 1 - \pi_H(o'|s, o')$  and for  $\pi_{\mathcal{O}}(o|s)$

we have  $\pi_{\mathcal{O}}(o|s) = \frac{\pi_H(o|s, o')}{\sum_{o' \neq o} \pi_H(o|s, o')} \Big|_{\forall o' \neq o} = \frac{\sum_{o' \neq o} \pi_H(o|s, o')}{\sum_{o' \neq o} \sum_{o \neq o'} \pi_H(o|s, o')}$ . Also, with  $o_{-1} \equiv \#$ , it can be directly found that  $\tilde{\mu}_0(s, o) = \tilde{\mu}_0(s, o = \#) \equiv \mu_0(s)$ . Since  $\mathbb{S}, \mathbb{A}, R_s^a, P_{s, s'}^a, \gamma$  are all defined the same between  $\mathcal{O}_{\text{one-step}}$  and  $\mathcal{O}$ , we can get that  $\mathcal{O}_{\text{one-step}} = \mathcal{O}$  holds under Assumption 1, and there exists an one-to-one mapping between  $(\pi_H(o|s, o'), \pi_L(a|s, o))$  and  $(\pi_o(a|s), \beta_{o'}(s), \pi_{\mathcal{O}}(o|s))$ .  $\square$

Combining with Theorem 1, this equivalency also suggests:

$$\rho_{\tilde{\pi}}(s, a, o, o') = \rho_{\tilde{\pi}^*}(s, a, o, o') \Leftrightarrow \tilde{\pi} = \tilde{\pi}^* \Leftrightarrow (\pi_o(a|s), \pi_{\mathcal{O}}(o|s), \beta_{o'}(s)) = (\pi_o^*(a|s), \pi_{\mathcal{O}}^*(o|s), \beta_{o'}^*(s)). \quad (11)$$

#### A.1.2. PROOF FOR THEOREM 1

The proof of Theorem 1 can be derived similar as that from Syed et al. (2008) by defining an augmented MDP with options:  $\tilde{s}_t \doteq (s_t, o_{t-1}) \in \mathbb{S} \times \mathbb{O}^+, \tilde{a}_t \doteq (a_t, o_t^A) \in \mathbb{A} \times \mathbb{O}, \tilde{\pi}(\tilde{a}_t|\tilde{s}_t) \doteq \pi_L(a_t|s_t, o_t^A) \pi_H(o_t^A|s_t, o_{t-1}), \tilde{P}_{\tilde{s}_t, \tilde{s}_{t+1}}^{\tilde{a}_t} \doteq P_{s_t, s_{t+1}}^{a_t} \mathbb{1}_{o_t = o_t^A}$ , where we denote  $o_t$  used in  $\tilde{a}_t$  as  $o_t^A$  for better distinguish from the option chosen in  $\tilde{s}_{t+1}$ , despite they should actually be the same.

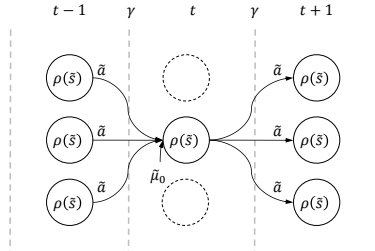

Figure 8. Illustration of the Bellman Flow on augmented MDP with options.

With the sugmented MDP, we can rewrite:

$$\begin{aligned} \rho(\tilde{s}, \tilde{a}) &\doteq \rho(s, a, o, o') \\ &= \pi_L(a|s, o) \pi_L(o|s, o') \left( \tilde{\mu}_0(s, o') + \gamma \sum_{s', a', o''} \rho(s', a', o', o'') P_{s', s}^{a'} \right) \\ &= \tilde{\pi}(\tilde{a}|\tilde{s}) \left( \tilde{\mu}_0 + \gamma \sum_{\tilde{s}', \tilde{a}'} \rho(\tilde{s}', \tilde{a}') \tilde{P}_{\tilde{s}', \tilde{s}}^{\tilde{a}'} \right) \end{aligned} \quad (12)$$

and construct a  $\tilde{\pi}$ -specific Bellman Flow constraint similar as that introduced by Syed et al. (2008):

$$\rho(\tilde{s}, \tilde{a}) = \tilde{\pi}(\tilde{a}|\tilde{s}) \left( \tilde{\mu}_0(\tilde{s}) + \gamma \sum_{\tilde{s}', \tilde{a}'} \rho(\tilde{s}', \tilde{a}') \tilde{P}_{\tilde{s}', \tilde{s}}^{\tilde{a}'} \right) \quad (13)$$

$$\rho(\tilde{s}, \tilde{a}) \geq 0. \quad (14)$$

Now we build the relation between the option-occupancy measurement  $\rho_{\tilde{\pi}}(\tilde{s}, \tilde{a})$  and the policy  $\tilde{\pi}(\tilde{a}|\tilde{s})$ .

**Lemma 1** *The option-occupancy measurement of  $\tilde{\pi}$  which is defined as  $\rho_{\tilde{\pi}}(\tilde{s}, \tilde{a}) = \mathbb{E} \left[ \sum_{t=0}^{\infty} \gamma^t \mathbf{1}_{(\tilde{s}_t=\tilde{s}, \tilde{a}_t=\tilde{a})} \right]$  satisfies the  $\tilde{\pi}$ -specific Bellman Flow constraint in Equation 13-14.*

*proof:* it can be directly find that Equation 14 is always satisfied as  $\rho_{\tilde{\pi}}(\tilde{s}, \tilde{a}) = \mathbb{E} \left[ \sum_{t=0}^{\infty} \gamma^t \mathbf{1}_{(\tilde{s}_t=\tilde{s}, \tilde{a}_t=\tilde{a})} \right] \geq 0$  always holds, we now verify the constraint in Equation 13:

$$\rho_{\tilde{\pi}}(\tilde{s}, \tilde{a}) = \mathbb{E} \left[ \sum_{t=0}^{\infty} \gamma^t \mathbf{1}_{(\tilde{s}_t=\tilde{s}, \tilde{a}_t=\tilde{a})} \right] = \sum_{t=0}^{\infty} \gamma^t P(\tilde{s}_t = \tilde{s}, \tilde{a}_t = \tilde{a}) \quad (15)$$

$$= \tilde{\pi}(\tilde{a}|\tilde{s}) \tilde{\mu}_0(\tilde{s}) + \sum_{t=1}^{\infty} \gamma^t P(\tilde{s}_t = \tilde{s}, \tilde{a}_t = \tilde{a}) \quad (16)$$

$$= \tilde{\pi}(\tilde{a}|\tilde{s}) \tilde{\mu}_0(\tilde{s}) + \sum_{t=1}^{\infty} \gamma^t \sum_{\tilde{s}', \tilde{a}'} P(\tilde{s}_t = \tilde{s}, \tilde{a}_t = \tilde{a}, \tilde{s}_{t-1} = \tilde{s}', \tilde{a}_{t-1} = \tilde{a}') \quad (17)$$

$$= \tilde{\pi}(\tilde{a}|\tilde{s}) \left( \tilde{\mu}_0(\tilde{s}) + \sum_{t=1}^{\infty} \gamma^t \sum_{\tilde{s}', \tilde{a}'} \tilde{P}_{\tilde{s}', \tilde{s}}^{\tilde{a}', \tilde{a}} P(\tilde{s}_{t-1} = \tilde{s}', \tilde{a}_{t-1} = \tilde{a}') \right) \quad (18)$$

$$= \tilde{\pi}(\tilde{a}|\tilde{s}) \left( \tilde{\mu}_0(\tilde{s}) + \gamma \sum_{\tilde{s}', \tilde{a}'} \tilde{P}_{\tilde{s}', \tilde{s}}^{\tilde{a}', \tilde{a}} \sum_{t=0}^{\infty} \gamma^t P(\tilde{s}_t = \tilde{s}', \tilde{a}_t = \tilde{a}') \right) \quad (19)$$

$$= \tilde{\pi}(\tilde{a}|\tilde{s}) \left( \tilde{\mu}_0(\tilde{s}) + \gamma \sum_{\tilde{s}', \tilde{a}'} \tilde{P}_{\tilde{s}', \tilde{s}}^{\tilde{a}', \tilde{a}} \mathbb{E}_{\tilde{\pi}} \left[ \sum_{t=0}^{\infty} \gamma^t \mathbf{1}_{(\tilde{s}_t=\tilde{s}', \tilde{a}_t=\tilde{a}')} \right] \right) \quad (20)$$

$$= \tilde{\pi}(\tilde{a}|\tilde{s}) \left( \tilde{\mu}_0(\tilde{s}) + \gamma \sum_{\tilde{s}', \tilde{a}'} \rho_{\tilde{\pi}}(\tilde{s}', \tilde{a}') \tilde{P}_{\tilde{s}', \tilde{s}}^{\tilde{a}', \tilde{a}} \right) \quad \square \quad (21)$$

**Lemma 2** *The function that satisfies the  $\tilde{\pi}$ -specific Bellman Flow constraint in Equation 13-14 is unique.*

*proof:* we first define an operator for policy  $\tilde{\pi}$ :  $\mathcal{T}^{\tilde{\pi}} : R^{|\mathbb{S} \times \mathbb{O}^+| \times |\mathbb{A} \times \mathbb{O}|} \mapsto R^{|\mathbb{S} \times \mathbb{O}^+| \times |\mathbb{A} \times \mathbb{O}|}$  for any function  $f \in R^{|\mathbb{S} \times \mathbb{O}^+| \times |\mathbb{A} \times \mathbb{O}|}$ :  $(\mathcal{T}^{\tilde{\pi}} f)(\tilde{s}, \tilde{a}) \doteq \tilde{\pi}(\tilde{a}|\tilde{s}) \left( \tilde{\mu}_0(\tilde{s}) + \gamma \sum_{\tilde{s}', \tilde{a}'} f(\tilde{s}', \tilde{a}') \tilde{P}_{\tilde{s}', \tilde{s}}^{\tilde{a}', \tilde{a}} \right)$ , then for any two functions  $\rho_1(\tilde{s}, \tilde{a}) \geq 0, \rho_2(\tilde{s}, \tilde{a}) \geq 0$  satisfy  $\rho_1 = \mathcal{T}^{\tilde{\pi}} \rho_1, \rho_2 = \mathcal{T}^{\tilde{\pi}} \rho_2$ , we have:

$$\sum_{\tilde{s}, \tilde{a}} |\rho_1 - \rho_2|(\tilde{s}, \tilde{a}) = \sum_{\tilde{s}, \tilde{a}} \left| \mathcal{T}^{\tilde{\pi}} \rho_1 - \mathcal{T}^{\tilde{\pi}} \rho_2 \right|(\tilde{s}, \tilde{a}) \quad (22)$$

$$= \sum_{\tilde{s}, \tilde{a}} \left| \tilde{\pi}(\tilde{a}|\tilde{s}) \gamma \sum_{\tilde{s}', \tilde{a}'} \tilde{P}_{\tilde{s}', \tilde{s}}^{\tilde{a}', \tilde{a}} (\rho_1 - \rho_2)(\tilde{s}', \tilde{a}') \right| = \gamma \sum_{\tilde{s}, \tilde{a}} \left| \sum_{\tilde{s}', \tilde{a}'} p(\tilde{s}, \tilde{a}|\tilde{s}', \tilde{a}') (\rho_1 - \rho_2)(\tilde{s}', \tilde{a}') \right| \quad (23)$$

$$\leq \gamma \sum_{\tilde{s}, \tilde{a}} \sum_{\tilde{s}', \tilde{a}'} p(\tilde{s}, \tilde{a}|\tilde{s}', \tilde{a}') |\rho_1 - \rho_2|(\tilde{s}', \tilde{a}') = \gamma \sum_{\tilde{s}', \tilde{a}'} |\rho_1 - \rho_2|(\tilde{s}', \tilde{a}') \quad (24)$$

$$= \gamma \sum_{\tilde{s}, \tilde{a}} |\rho_1 - \rho_2|(\tilde{s}, \tilde{a}) \quad (25)$$

$$\therefore \sum_{\tilde{s}, \tilde{a}} |\rho_1 - \rho_2|(\tilde{s}, \tilde{a}) \geq 0, \gamma < 1 \quad (26)$$

$$\therefore \sum_{\tilde{s}, \tilde{a}} |\rho_1 - \rho_2|(\tilde{s}, \tilde{a}) = 0 \Rightarrow \rho_1 = \rho_2 \quad \square \quad (27)$$

**Lemma 3** *There is a bijection between  $\tilde{\pi}(\tilde{a}|\tilde{s})$  and  $(\pi_H(o|s, o'), \pi_L(a|s, o))$ , where  $\tilde{\pi}(\tilde{a}|\tilde{s}) = \tilde{\pi}(a, o|s, o') = \pi_L(a|s, o)\pi_H(o|s, o')$  and  $\pi_H(o|s, o') = \sum_a \tilde{\pi}(a, o|s, o')$ ,  $\pi_L(a|s, o) = \frac{\tilde{\pi}(a, o|s, o')}{\sum_a \tilde{\pi}(a, o|s, o')} \Big|_{\forall o'} = \frac{\sum_{o'} \tilde{\pi}(a, o|s, o')}{\sum_{a, o'} \tilde{\pi}(a, o|s, o')}$*

With Lemma 1 and Lemma 2, the proof of Theorem 1 is provided:

*proof:* For any  $\rho(s, a, o, o') = \rho(\tilde{s}, \tilde{a}) \in \mathbb{D} = \left\{ \rho(\tilde{s}, \tilde{a}) \geq 0; \sum_{\tilde{a}} \rho(\tilde{s}, \tilde{a}) = \tilde{\mu}_0(\tilde{s}) + \gamma \sum_{\tilde{s}', \tilde{a}'} \rho(\tilde{s}', \tilde{a}') \tilde{P}_{\tilde{s}', \tilde{s}}^{\tilde{a}'}$ , and a policy  $\tilde{\pi}(\tilde{a}|\tilde{s})$  satisfies:

$$\tilde{\pi}(\tilde{a}|\tilde{s}) = \frac{\rho(\tilde{s}, \tilde{a})}{\sum_{\tilde{a}} \rho(\tilde{s}, \tilde{a})} = \frac{\rho(\tilde{s}, \tilde{a})}{\tilde{\mu}_0(\tilde{s}) + \gamma \sum_{\tilde{s}', \tilde{a}'} \rho(\tilde{s}', \tilde{a}') \tilde{P}_{\tilde{s}', \tilde{s}}^{\tilde{a}'}}. \quad (28)$$

With Equation 28  $\rho$  should be a solution of Equation 13-14, and with Lemma 1-2, the solution is unique and equals to the occupancy measurement of  $\tilde{\pi}$ . With Lemma 3,  $\rho$  is also the unique occupancy measurement of  $(\pi_H, \pi_L)$ .

On the other hand, If  $\rho_{\tilde{\pi}}$  is the occupancy measurement of  $\tilde{\pi}$ , we have:

$$\sum_{\tilde{a}} \tilde{\pi}(\tilde{a}|\tilde{s}) = 1 = \frac{\sum_{\tilde{a}} \rho_{\tilde{\pi}}(\tilde{s}, \tilde{a})}{\tilde{\mu}_0(\tilde{s}) + \gamma \sum_{\tilde{s}', \tilde{a}'} \rho_{\tilde{\pi}}(\tilde{s}', \tilde{a}') \tilde{P}_{\tilde{s}', \tilde{s}}^{\tilde{a}'}}. \quad (29)$$

which indicates that  $\rho_{\tilde{\pi}} \in \mathbb{D}$  and  $\tilde{\pi}(a, o|s, o') = \frac{\rho_{\tilde{\pi}}(s, a, o, o')}{\sum_{a, o} \rho_{\tilde{\pi}}(s, a, o, o')}$ , also:

$$\pi_H(o|s, o') = \sum_a \tilde{\pi}(a, o|s, o') = \frac{\sum_a \rho_{\tilde{\pi}}(s, a, o, o')}{\sum_{a, o} \rho_{\tilde{\pi}}(s, a, o, o')} \quad (30)$$

$$\pi_L(a|s, o) = \frac{\sum_{o'} \tilde{\pi}(a, o|s, o')}{\sum_{a, o'} \tilde{\pi}(a, o|s, o')} = \frac{\sum_{o'} \rho_{\tilde{\pi}}(s, a, o, o')}{\sum_{a, o'} \rho_{\tilde{\pi}}(s, a, o, o')} \quad \square \quad (31)$$

### A.1.3. PROOF FOR THEOREM 2

We first adapt the corollary on [Ghasemipour et al. \(2020\)](#) into its option-version.

**Lemma 4** *Optimizing the  $f$ -divergence between  $\rho_{\tilde{\pi}}$  and  $\rho_{\tilde{\pi}_E}$  equals to perform  $\tilde{\pi}^* = \text{HRL}(c^*)$  with  $c^* = \text{HIRL}_\psi(\tilde{\pi}_E)$ :  $\tilde{\pi}^* = \text{HRL} \circ \text{HIRL}_\psi(\tilde{\pi}_E) = \arg \min_{\tilde{\pi}} -\mathbb{H}(\tilde{\pi}) + D_f(\rho_{\tilde{\pi}}(s, a, o, o') \| \rho_{\tilde{\pi}_E}(s, a, o, o'))$*

*proof:* we take similar deviations from that provided by [Ghasemipour et al. \(2020\)](#). Let  $f$  be a function defining a  $f$ -divergence and let  $f^*$  be the convex conjugate of  $f$ . Given  $\rho_{\tilde{\pi}_E}$  and cost functions  $c(s, a, o, o')$  defined on  $\mathbb{S} \times \mathbb{A} \times \mathbb{O} \times \mathbb{O}^+$ , we can define the cost function regularizer used by our option-based HIRL as  $\psi_f(c) \doteq$

$\mathbb{E}_{\rho_{\tilde{\pi}_E}(s,a,o,o')} \left[ f^*(c(s,a,o,o')) - c(s,a,o,o') \right]$  and a similar relation holds:

$$\psi_f^* (\rho_{\tilde{\pi}}(s,a,o,o') - \rho_{\tilde{\pi}_E}(s,a,o,o')) \quad (32)$$

$$= \sup_{c(\cdot)} \left[ \sum_{s,a,o,o'} (\rho_{\tilde{\pi}} - \rho_{\tilde{\pi}_E})(s,a,o,o') c(s,a,o,o') - \psi_f(c) \right] \quad (33)$$

$$= \sup_{c(\cdot)} \left[ \sum_{s,a,o,o'} (\rho_{\tilde{\pi}} - \rho_{\tilde{\pi}_E})(s,a,o,o') c(s,a,o,o') - \sum_{s,a,o,o'} \rho_{\tilde{\pi}_E}(s,a,o,o') \left( f^*(c(s,a,o,o')) - c(s,a,o,o') \right) \right] \quad (34)$$

$$= \sup_{c(\cdot)} \left[ \sum_{s,a,o,o'} \left[ \rho_{\tilde{\pi}}(s,a,o,o') c(s,a,o,o') - \rho_{\tilde{\pi}_E}(s,a,o,o') f^*(c(s,a,o,o')) \right] \right] \quad (35)$$

$$= \sup_{c(\cdot)} \left[ \mathbb{E}_{\rho_{\tilde{\pi}}} [c(s,a,o,o')] - \mathbb{E}_{\rho_{\tilde{\pi}_E}} [f^*(c(s,a,o,o'))] \right], \text{ let } T_\omega = c \quad (36)$$

$$= \sup_{T_\omega} \left[ \mathbb{E}_{\rho_{\tilde{\pi}}} [T_\omega(s,a,o,o')] - \mathbb{E}_{\rho_{\tilde{\pi}_E}} [f^*(T_\omega(s,a,o,o'))] \right] \quad (37)$$

$$= D_f (\rho_{\tilde{\pi}}(s,a,o,o') \| \rho_{\tilde{\pi}_E}(s,a,o,o')), \quad (38)$$

where  $\tilde{\pi}^* = \text{HRL} \circ \text{HIRL}_\psi(\tilde{\pi}_E) = \arg \min_{\tilde{\pi}} -\mathbb{H}(\tilde{\pi}) + \psi_f^* (\rho_{\tilde{\pi}}(s,a,o,o') - \rho_{\tilde{\pi}_E}(s,a,o,o')) = \arg \min_{\tilde{\pi}} -\mathbb{H}(\tilde{\pi}) + D_f (\rho_{\tilde{\pi}}(s,a,o,o') \| \rho_{\tilde{\pi}_E}(s,a,o,o'))$ .  $\square$

Similar as Ghasemipour et al. (2020), we omit the entropy regularizer term in Lemma 4, thus after the optimization in M-step we have  $D_f (\rho_{\tilde{\pi}^{n-1}}(s,a,o,o') \| \rho_E(s,a) p_{\tilde{\pi}^{n-1}}(o,o'|s,a)) \geq D_f (\rho_{\tilde{\pi}^n}(s,a,o,o') \| \rho_E(s,a) p_{\tilde{\pi}^n}(o,o'|s,a))$ . Now we are ready for proving Theorem 2:

*proof:* Since the option of expert is inferred based on the policy  $\tilde{\pi}^n$  on each optimization step, we separate the expert option-occupancy measurement estimated with  $\tilde{\pi}^n$  as:  $\rho_{\tilde{\pi}_E}(s,a,o,o') = \rho_E(s,a) p_{\tilde{\pi}^n}(o,o'|s,a)$ . By repeating the definition of  $Q_n$  in our main paper, we have

$$Q_n = \mathbb{E}_{p_{\tilde{\pi}^{n-1}}(o,o'|s,a)} \left[ D_f (\rho_{\tilde{\pi}^n}(s,a,o,o') \| \rho_{\tilde{\pi}_E}(s,a,o,o')) \right] \quad (39)$$

$$= \sum_{s,a,o,o'} \rho_E(s,a) p_{\tilde{\pi}^{n-1}}(o,o'|s,a) f \left( \frac{\rho_{\tilde{\pi}^n}(s,a,o,o')}{\rho_E(s,a) p_{\tilde{\pi}^{n-1}}(o,o'|s,a)} \right) \geq \sum_{s,a} \rho_E(s,a) f \left( \frac{\rho_{\tilde{\pi}^n}(s,a)}{\rho_E(s,a)} \right) \quad (f \text{ is convex}) \quad (40)$$

$$= \sum_{s,a,o,o'} \rho_E(s,a) p_{\tilde{\pi}^n}(o,o'|s,a) f \left( \frac{\rho_{\tilde{\pi}^n}(s,a,o,o')}{\rho_E(s,a) p_{\tilde{\pi}^n}(o,o'|s,a)} \right) \quad (\text{E-Step}) \geq \sum_{s,a,o,o'} \rho_E(s,a) p_{\tilde{\pi}^n}(o,o'|s,a) f \left( \frac{\rho_{\tilde{\pi}^{n+1}}(s,a,o,o')}{\rho_E(s,a) p_{\tilde{\pi}^n}(o,o'|s,a)} \right) \quad (\text{M-Step}) \geq Q_{n+1}. \quad \square \quad (41)$$

With Equation 39, Equation 40 and Equation 41 we can also obtain:

$$D_f (\rho_{\tilde{\pi}^n}(s,a,o,o') \| \rho_E(s,a) p_{\tilde{\pi}^n}(o,o'|s,a)) \geq D_f (\rho_{\tilde{\pi}^{n+1}}(s,a,o,o') \| \rho_E(s,a) p_{\tilde{\pi}^{n+1}}(o,o'|s,a)) \quad (42)$$

$$\Rightarrow D_f (\rho_{\tilde{\pi}^n}(s,a) \| \rho_E(s,a)) \geq D_f (\rho_{\tilde{\pi}^{n+1}}(s,a) \| \rho_E(s,a)) \quad (43)$$

## A.2. Experimental Details and Extra Results

Here we provide more comparative results on several counterparts, as well as the experimental details.<sup>2</sup>

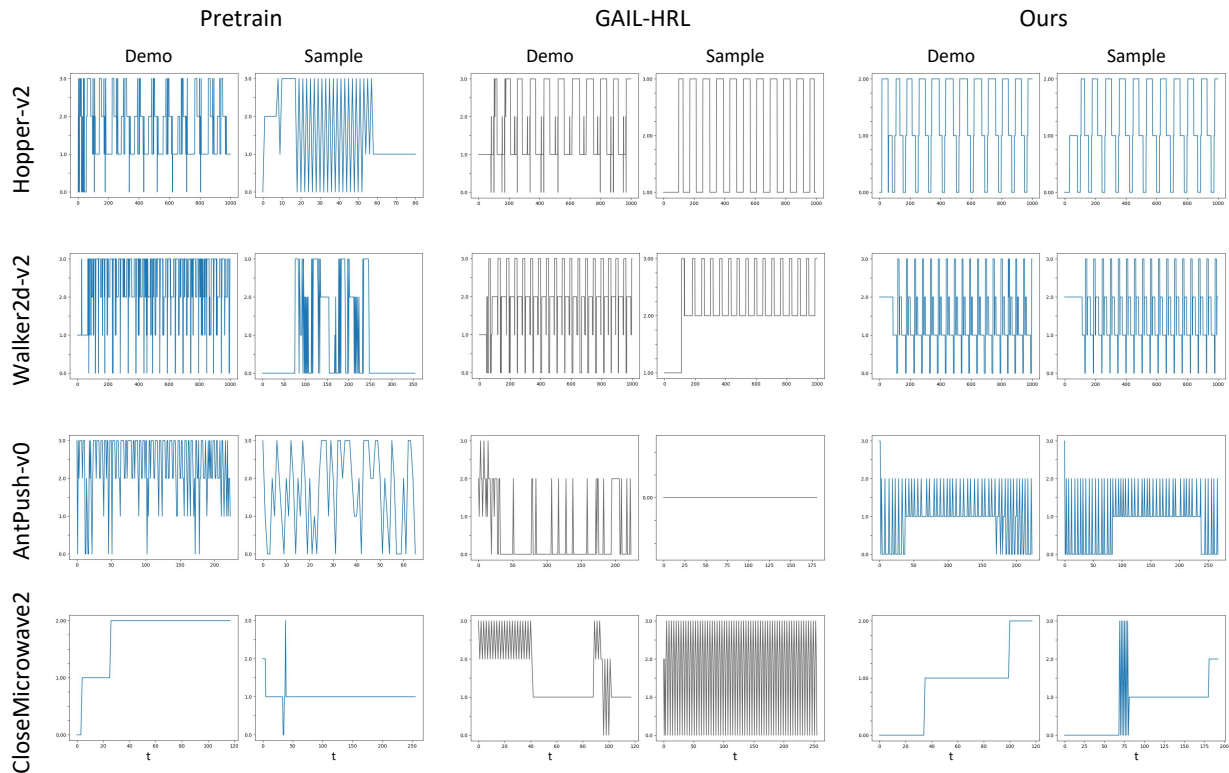

Figure 9. Visualization of the options activated at each step, learned respectively by pretraining and fixing high-level policy (Pretrain, refers to Directed-info GAIL (Sharma et al., 2018)), Mixer of Expert (MoE, refers to OptionGAN (Henderson et al., 2018)), GAIL-HRL and our proposed method. 'Demo' denotes the options inferred from the expert, and 'Sample' denotes the options used by agent when doing self-explorations. The effectiveness of our proposed method on regularizing the option switching is obvious by comparing the consistent switching tendencies between Demo and Sample.

### A.2.1. EXTRA RESULTS

Table 2. Comparative results. All results are measured by the average **maximum average reward-sum** among different trails.

|                         | Hopper-v2                                   | Walker2d-v2                                 | AntPush-v0                                    | CloseMicrowave2                              |
|-------------------------|---------------------------------------------|---------------------------------------------|-----------------------------------------------|----------------------------------------------|
| Demos $(s, a) \times T$ | $(\mathbb{R}^{11}, \mathbb{R}^3) \times 1k$ | $(\mathbb{R}^{17}, \mathbb{R}^6) \times 5k$ | $(\mathbb{R}^{107}, \mathbb{R}^8) \times 50k$ | $(\mathbb{R}^{101}, \mathbb{R}^8) \times 1k$ |
| Demo Reward             | 3656.17±0.0                                 | 5005.80±36.18                               | 116.60±14.07                                  | —                                            |
| GAIL                    | 535.29±7.19                                 | 2787.87±2234.46                             | 56.45±3.17                                    | 39.14±12.87                                  |
| Pretrain                | 436.55±27.74                                | 891.70±100.58                               | -0.07±1.50                                    | 74.34±20.16                                  |
| MoE                     | 3254.12±446.78                              | 2722.11±2217.80                             | 39.73±37.00                                   | 33.33±25.07                                  |
| GAIL-HRL                | 3697.40±1.14                                | 3687.63±982.99                              | 20.53±6.90                                    | 56.95±25.74                                  |
| Ours                    | <b>3700.42±1.70</b>                         | <b>4836.85±100.09</b>                       | <b>95.00±2.70</b>                             | <b>100.74±21.33</b>                          |

### A.2.2. EXPERIMENTAL DETAILS

<sup>2</sup>The source code is provided at [Option-GAIL.git](https://github.com/option-gail). For setting up the environments correctly, please also refer to [OpenAI-Gym](https://gym.openai.com/) (Brockman et al., 2016) and [RLBench](https://github.com/JamesJames/RLBench) (James et al., 2020)

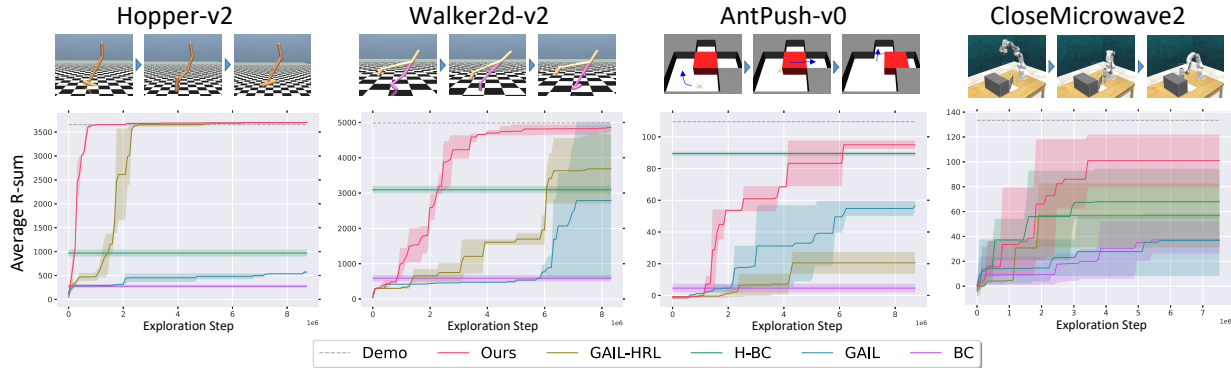

Figure 10. comparison of learning performance on four environments. We compare the **maximum average reward-sums** vs. exploration steps on different environments. The solid line indicates the average performance among several trials under different random seeds, while the shade indicates the range of the maximum average reward-sums over different trials.

| $ O $ | Option-Viterbi / total (s) | %     |
|-------|----------------------------|-------|
| 2     | 0.0938/57.785              | 0.16% |
| 3     | 0.0884/90.199              | 0.10% |
| 4     | 0.0840/102.00              | 0.08% |
| 5     | 0.0938/126.05              | 0.07% |
| 6     | 0.1014/142.64              | 0.07% |

Table 3. The computation time of Option-Viterbi comparing with the overall learning time costs

Table 4. Configurations and hyper-parameters

| Name            | Value | Name            | Value  |
|-----------------|-------|-----------------|--------|
| $\gamma$        | 0.99  | learning rate   | 0.0003 |
| $\lambda_{M_L}$ | 0     | $\lambda_{M^H}$ | 0.01   |
| batch size(T)   | 4096  | mini batch size | 64     |
